# Supplementary material for: Acute effects of drinks containing blackcurrant and citrus (poly)phenols and dietary fibre on postprandial glycaemia, gut hormones, cognitive function and appetite in healthy adults: two randomised controlled trials
Source: Royal Society of Chemistry journal article supplement (doi:10.1039/d3fo03085g), 2023-01-01
Supplement: d3fo03085g1.pdf [file d3fo03085g1.pdf]

## Supplementary figures and tables

### Supplementary methods

Page 3      **Supplementary method 1. Determination of pectin content**

### Supplementary tables

Page 4      **Supplementary table 1. Formulation and nutritional composition of the test drinks.**

Page 6      **Supplementary table 2. Nutritional composition of the ad libitum pasta meal.**

Page 7      **Supplementary table 3 – GLU-MIX: cognitive testing outcomes**

Page 8      **Supplementary table 4 – GLU-MIX: Ad Libitum Energy Intake**

### Supplementary figures

Page 9      **Supplementary Figure 1. Study visit protocol for the GLU-FX study.**

Page 10     **Supplementary figure 2. Study visit protocol for the GLU-MIX study.**

Page 11     **Supplementary figure 3 – GLU-FX: mean serum insulin concentrations over time by treatment**

Page 12     **Supplementary figure 4 – GLU-FX: mean serum C-peptide concentrations over time by treatment**

Page 13     **Supplementary figure 5 – GLU-FX: mean serum non-esterified fatty acids over time by treatment intent to treat population**

Page 14     **Supplementary figure 6 – GLU-FX: mean plasma PYY concentrations over time by treatment**

Page 15     **Supplementary figure 7 – GLU-FX: mean plasma GLP-1 concentrations over time by treatment**

Page 16     **Supplementary figure 8 – GLU-FX Study: postprandial hunger, desire to eat and fullness scores by treatment.**

Page 17     **Supplementary figure 9 - GLU-FX Study: Ratings of enjoyment, taste, bitterness and aftertaste of the test drinks.**

|                |                                                                                                                                           |
|----------------|-------------------------------------------------------------------------------------------------------------------------------------------|
| <b>Page 18</b> | <b>Supplementary figure 10 - GLU-FX Study: Ratings of difficulty to consume and texture of the test drinks.</b>                           |
| <b>Page 19</b> | <b>Supplementary figure 11 – GLU-MIX: mean serum insulin concentrations over time by treatment</b>                                        |
| <b>Page 20</b> | <b>Supplementary figure 12 – GLU-MIX: mean serum C-peptide concentrations over time by treatment</b>                                      |
| <b>Page 21</b> | <b>Supplementary figure 13 – GLU-MIX Study: postprandial hunger, desire to eat, and fullness scores by treatment.</b>                     |
| <b>Page 22</b> | <b>Supplementary figure 14 – GLU-MIX Study: postprandial thirstiness, happiness, feeling energised and alertness scores by treatment.</b> |
| <b>Page 23</b> | <b>Supplementary figure 15 - GLU-MIX Study: Ratings of difficulty to consume, bitterness and texture of the test drinks.</b>              |
| <b>Page 24</b> | <b>Supplementary figure 16 - GLU-MIX Study: Ratings of enjoyment, taste and aftertaste of the test drinks.</b>                            |

## Supplementary methods

### Method for determination of pectin content

To determine the soluble pectin content, freeze dried samples were firstly refluxed with 80% (v/v) ethanol at 80 °C for 1 h to remove low molecular weight sugars. Then, the alcohol-insoluble residue was dissolved in hot water (90°C) for another 2 h. After centrifugation (4000 × g for 15 min), the extracts were concentrated and then precipitated with three volumes of 95% (v/v) ethanol overnight at 4°C. The precipitates were washed twice with 70% of ethanol and dissolved in deionised water. Finally, the water-soluble pectin fractions were freeze dried and used for determination of pectin content by *m*-hydroxydiphenyl method with galacturonic acid (GalA) as a standard according to a previous method with minor modifications<sup>1</sup>. In brief, 9 mg of freeze-dried pectin fraction from pulp or 6 mg of the pectin fraction from pulp + BC were dissolved in 10 mL deionised water, respectively. Then 100 µL samples were mixed with 1 mL of 12.5 mM sodium tetraborate in H<sub>2</sub>SO<sub>4</sub>, and then stirred vigorously and heated to 95°C for 10 min. After cooling to room temperature, 20 µL of 0.15% (w/v) *m*-hydroxydiphenyl in 0.5% (w/v) NaOH was added and stirred by vortex mixing. The samples were then kept at room temperature for 10 min and absorbances were read at 525 nm.

### Results

|                                  | Pulp       | Pulp + BC  | Placebo |
|----------------------------------|------------|------------|---------|
| Pectin (GalA content, mg GalA/g) | 25.8 ± 1.0 | 51.1 ± 0.5 | —       |

Values represent means ± standard errors. GalA, galacturonic acid. BC, Blackcurrant.

1. Filisetti-Cozzi, T.M.C.C. and N.C. Carpita, Measurement of uronic acids without Interference from neutral sugars. *Analytical Biochemistry*, 1991, **197**, 157-162.

## Supplementary tables

**Supplementary table 1. Formulation and nutritional composition of the test drinks.**

| Per 200 ml                                 | GLU-FX study |        |        |        |         | GLU-MIX study |        |        |
|--------------------------------------------|--------------|--------|--------|--------|---------|---------------|--------|--------|
|                                            | CON          | H-BC   | L-BC   | L-SO   | H-Blend | CON2          | F      | BC+F   |
| <b>Formulation</b>                         |              |        |        |        |         |               |        |        |
| BC extract, g                              | 0.00         | 57.76  | 28.88  | 0.00   | 28.88   | 0.00          | 0.00   | 25.21  |
| SO extract, g                              | 0.00         | 0.00   | 0.00   | 0.87   | 0.87    | 0.00          | 0.00   | 0.00   |
| Orange pulp, g                             | 0.00         | 0.00   | 0.00   | 0.00   | 0.00    | 0.00          | 30.61  | 30.61  |
| Glucose syrup, g                           | 13.96        | 17.03  | 15.49  | 13.96  | 15.48   | 0.00          | 0.00   | 0.00   |
| Glucose-fructose syrup, g                  | 5.33         | 0.00   | 2.67   | 5.33   | 2.67    | 3.12          | 1.90   | 1.20   |
| Granulated sugar                           | 0.18         | 0.00   | 0.09   | 0.18   | 0.09    | 1.14          | 0.00   | 0.00   |
| Maltodextrin                               | 0.00         | 0.00   | 0.00   | 0.00   | 0.00    | 3.40          | 3.60   | 0.00   |
|                                            |              |        |        |        |         |               |        |        |
| <b>Nutritional composition</b>             |              |        |        |        |         |               |        |        |
| Energy (kJ)                                | 245.89       | 272.98 | 259.29 | 245.93 | 259.43  | 111.79        | 133.98 | 135.65 |
| Energy, kcal                               | 58.73        | 65.2   | 61.93  | 58.74  | 61.94   | 26.7          | 32.0   | 32.4   |
| Carbohydrate, g                            | 14.81        | 16.29  | 15.5   | 14.81  | 15.55   | 6.68          | 6.79   | 6.76   |
| Total sugar (g) <sup>1</sup>               | 10.00        | 9.74   | 9.49   | 9.74   | 9.49    | 3.8           | 3.7    | 3.6    |
| Glucose, g                                 | 5.05         | 5.05   | 5.05   | 5.05   | 5.05    | 1.32          | 1.19   | 1.03   |
| Fructose, g                                | 1.59         | 1.59   | 1.59   | 1.59   | 1.59    | 1.00          | 1.00   | 1.00   |
| Maltose, g                                 | 2.67         | 3.12   | 2.89   | 2.67   | 2.89    | 0.10          | 0.06   | 0.28   |
| Sucrose, g                                 | 0.18         | 0.19   | 0.18   | 0.18   | 0.18    | 1.37          | 1.42   | 1.30   |
| Fat, g                                     | 0            | 0      | 0      | 0      | 0       | 0             | 0      | 0      |
| Protein, g                                 | 0            | 0      | 0      | 0      | 0       | 0             | 0.34   | 0.34   |
| Total dietary fibre (AOAC), g <sup>2</sup> | NA           | NA     | NA     | NA     | NA      | 0             | 1.5    | 1.5    |
| Pectin, mg GalA <sup>2</sup>               | NA           | NA     | NA     | NA     | NA      | 0             | 232    | 449    |
|                                            |              |        |        |        |         |               |        |        |
| <b>Phenolic composition</b>                |              |        |        |        |         |               |        |        |
| Total polyphenols,                         | 0            | 1600   | 800    | 800    | 1600    | 0             | 25     | 800    |

|                              |      |      |      |      |      |      |      |      |
|------------------------------|------|------|------|------|------|------|------|------|
| mg <sup>3</sup>              |      |      |      |      |      |      |      |      |
| Anthocyanin, mg <sup>4</sup> | 0    | 1155 | 578  | 0    | 578  | NA   | NA   | 578  |
| Hesperidin, mg               | 0    | 0    | 0    | 785  | 785  | NA   | NA   | NA   |
|                              |      |      |      |      |      |      |      |      |
| <b>pH</b>                    | <4.1 | <4.1 | <4.1 | <4.1 | <4.1 | 2.78 | 3.35 | 3.39 |

CON, 0 mg of blackcurrant (BC) or sweet orange (SO) polyphenols; H-BC, 1600 mg of BC polyphenols; L-BC, 800 mg of BC polyphenols; L-SO, 800 mg of SO polyphenols; H-Blend, 800 mg BC polyphenols + 800 mg SO polyphenols; CON2, 0 mg BC polyphenols and 0 g fibre; F, 1.5 g total fibre; BC+F, 800 mg BC polyphenols + 1.5 g total fibre; NA, not analysed. Dietary fibre for BC+F and F treatments provided by orange pulp. <sup>1</sup>Sugars content analysed by ion exchange chromatography. <sup>2</sup>Fibre analysed by enzymatic-gravimetry (internal method, Eurofins Analisis Alimentario Nordeste SL, Barcelona, Spain) and pectin (GalA: galacturonic acid) by the *m*-hydroxydiphenyl method with galacturonic acid as a standard. <sup>3</sup>Total phenolics analysed by Folin—Ciocalteu method. <sup>4</sup>Total anthocyanins analysed by pH differential method and spectrophotometry.

**Supplementary table 2. Nutritional composition of the *ad libitum* pasta meal.**

| Product            | Ingredients amount (g) | Carbohydrate (g) | Protein (g) | Fat (g)    | Fibre (g)  | Energy (kcal) |
|--------------------|------------------------|------------------|-------------|------------|------------|---------------|
| Farfalle (dry)     | 500                    | 341              | 60          | 10         | 24.5       | 1741          |
| Tomato sauce       | 760                    | 58               | 9.9         | 4.6        | 9.9        | 331           |
| Olive oil          | 40                     | 0                | 0           | 40         | 0          | 360           |
| Grated hard cheese | 40                     | 1.2              | 18.3        | 14.9       | 0          | 212           |
| <b>Total</b>       |                        | <b>400</b>       | <b>88</b>   | <b>70</b>  | <b>34</b>  | <b>2644</b>   |
| <b>Per 100g</b>    |                        | <b>29.8</b>      | <b>6.5</b>  | <b>5.2</b> | <b>2.6</b> | <b>197</b>    |

Supplementary table 3 – GLU-MIX: cognitive testing outcomes

| Cognitive Testing Outcomes |                                        | BC+F vs. CON2<br>Mean difference (95% CI) | P value       |
|----------------------------|----------------------------------------|-------------------------------------------|---------------|
| Choice Reaction Time       | Percentage Accuracy (%)                | -1.0 (-2.0, 1.0)                          | 0.3138        |
|                            | Reaction Time Overall (msec)           | 9.69 (-32.37, 36.88)                      | 0.5888        |
|                            | Reaction Time Correct Responses (msec) | 6.10 (-38.05, 36.91)                      | 0.7844        |
| RVIP                       | Percentage Accuracy (%)                | 3.75 (-3.75, 10.00)                       | 0.3323        |
|                            | Reaction Time Correct Responses (msec) | 0.90 (-43.20, 44.72)                      | 0.9235        |
|                            | Number of False Alarms                 | 0.0 (-2.5, 2.5)                           | 0.8471        |
| Simple Reaction Time       | Reaction Time Overall (msec)           | -15.92 (-45.94, 12.28)                    | 0.2868        |
| Stroop                     | Percentage Accuracy (%) Overall        | 0.00 (-1.66, 0.84)                        | 0.6047        |
|                            | Reaction Time Overall (msec)           | -36.81 (-101.7, 15.25)                    | 0.1313        |
|                            | Reaction Time Correct Responses (msec) | -45.83 (-107.5, 8.75)                     | 0.0959        |
| Four choice Reaction Time  | Percentage Accuracy (%)                | 0.00 (-1.04, 1.05)                        | 0.7715        |
|                            | Reaction Time Overall (msec)           | -41.89 (-97.18, -4.64)                    | <b>0.0295</b> |
|                            | Reaction Time Correct Responses (msec) | -40.90 (-96.59, -1.99)                    | <b>0.0407</b> |
| Serial Subtraction         | Total Responses                        | -0.5 (-3.0, 2.0)                          | 0.7444        |
|                            | Correct Responses                      | 1.0 (-2.0, 3.0)                           | 0.6124        |
|                            | Errors                                 | -1.0 (-2.0, 0.0)                          | <b>0.0443</b> |

BC+F, 800 mg BC polyphenols + 1.5 g total fibre; CON2, 0 mg BC polyphenols and 0 g fibre; RVIP, rapid visual information processing. Cognitive performance assessed using the Computerised Mental Performance Assessment System (COMPASS, Northumbria University, Newcastle Upon Tyne, UK). Reaction times were measured in milliseconds and accuracy was measured as a percentage of correct responses.

**Supplementary table 4 – GLU-MIX: Ad Libitum Energy Intake**

|                          | BC+F<br>(N=37)         | F<br>(N=37)            | CON2<br>(N=38)         |
|--------------------------|------------------------|------------------------|------------------------|
| Total pasta consumed (g) |                        |                        |                        |
| Adjusted Mean (95% CI)   | 668.65 (576.52,760.78) | 641.70 (549.24,734.16) | 672.57 (580.11,765.03) |
| Energy intake (kcal)     |                        |                        |                        |
| Adjusted Mean (95% CI)   | 1317 (1136, 1499)      | 1264 (1082, 1446)      | 1325 (1143, 1507)      |

Adjusted Mean represents the adjusted mean from a linear mixed model with fixed factors for treatment and period, and subject as a random effect. CON2, 0 mg BC polyphenols and 0 g fibre; F, 1.5 g total fibre; BC+F, 800 mg BC polyphenols + 1.5 g total fibre.



## Supplementary figures

Supplementary Figure 1. Study visit protocol for the GLU-FX study.

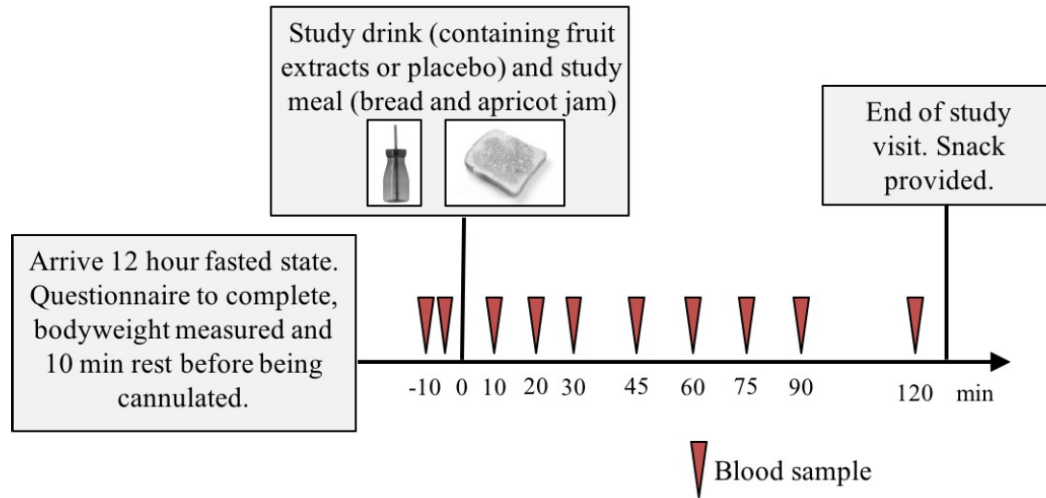

Supplementary figure 2. Study visit protocol for the GLU-MIX study.

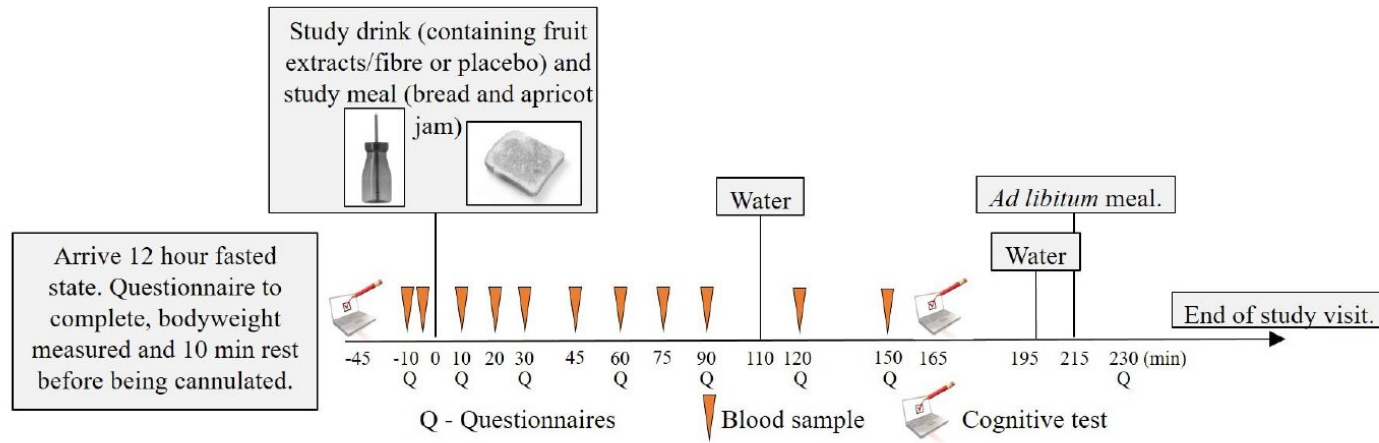

Supplementary figure 3 – GLU-FX: mean serum insulin concentrations over time by treatment

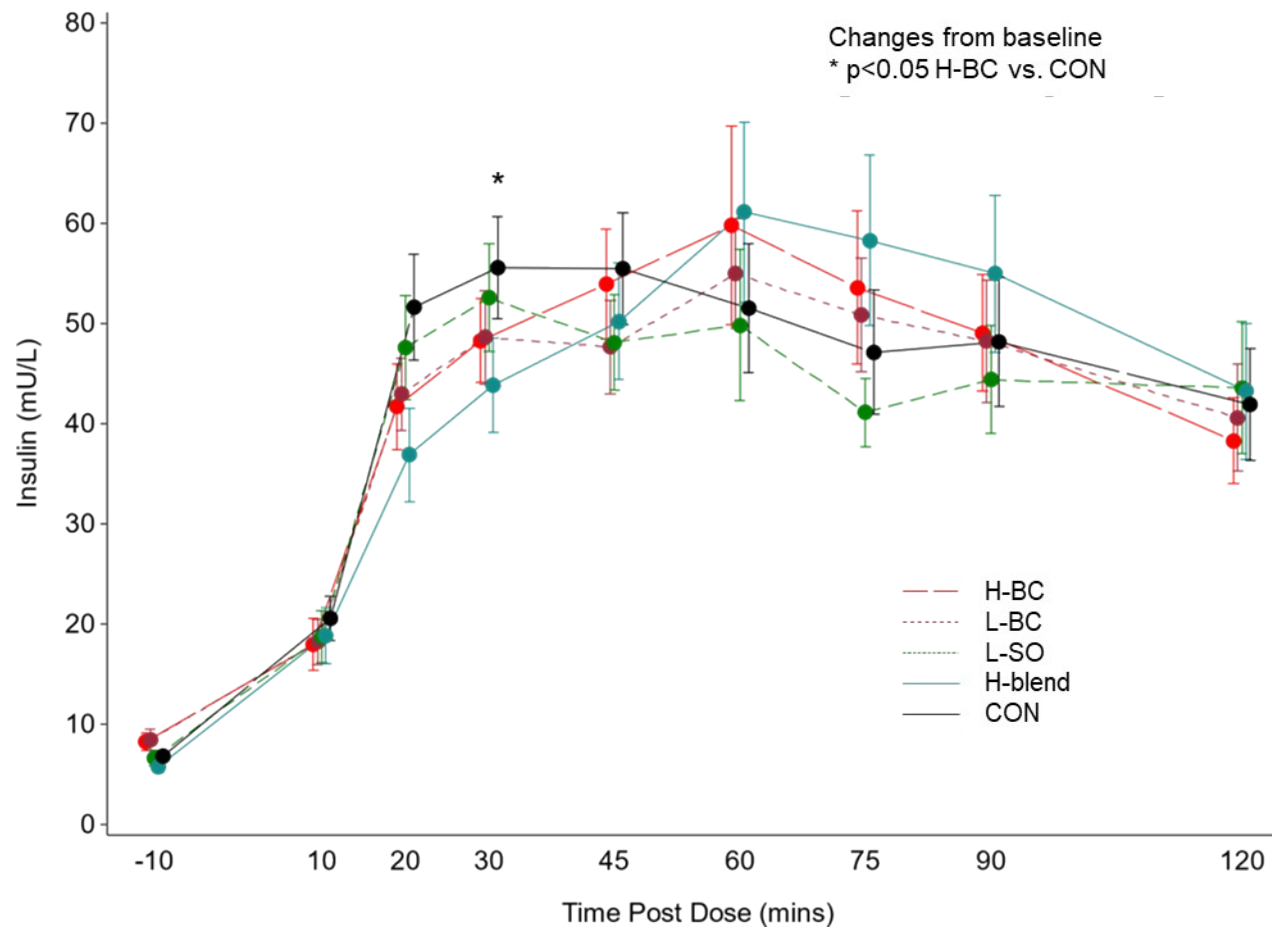

Error bars represent standard error. CON, 0 mg of blackcurrant (BC) or sweet orange (SO) polyphenols; H-BC, 1600 mg of BC polyphenols; L-BC, 800 mg of BC polyphenols; L-SO, 800 mg of SO polyphenols; H-Blend, 800 mg BC polyphenols + 800 mg SO polyphenols.

Supplementary figure 4 – GLU-FX: mean serum C-peptide concentrations over time by treatment

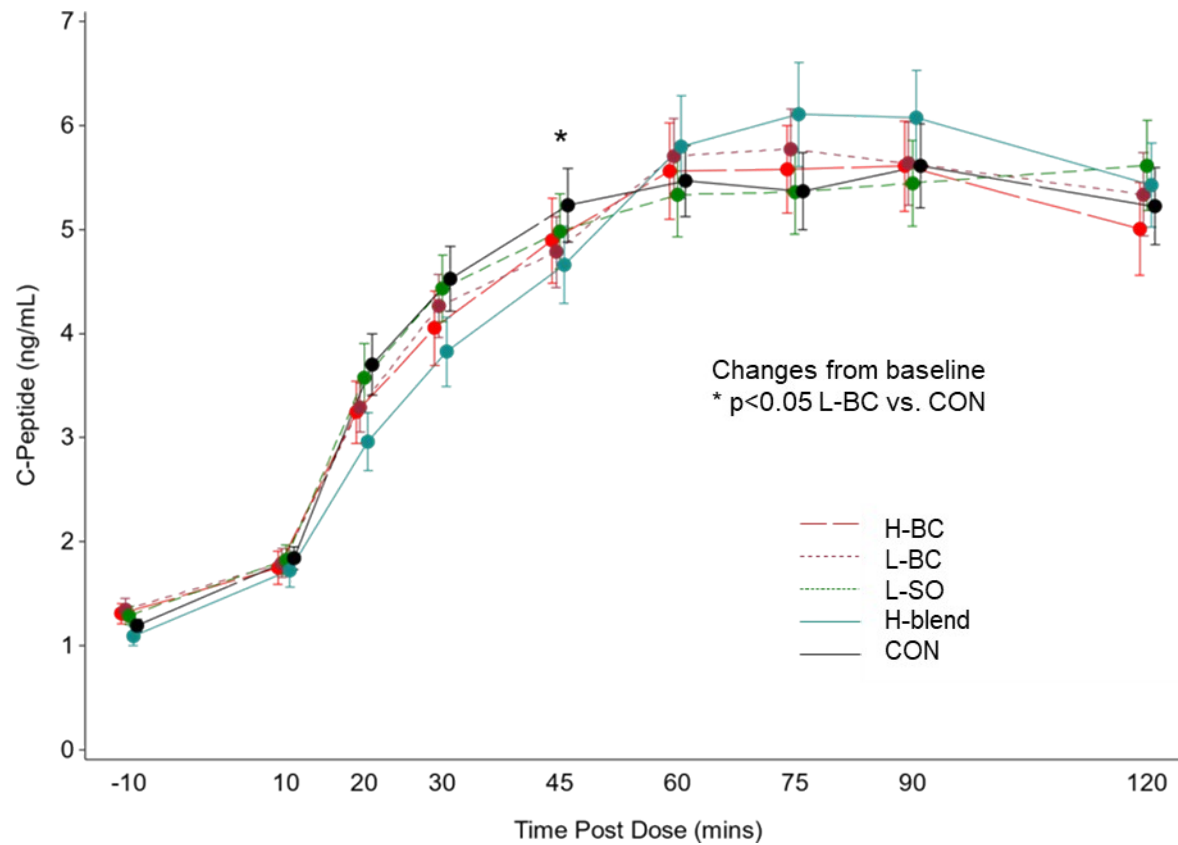

Error bars represent standard error. CON, 0 mg of blackcurrant (BC) or sweet orange (SO) polyphenols; H-BC, 1600 mg of BC polyphenols; L-BC, 800 mg of BC polyphenols; L-SO, 800 mg of SO polyphenols; H-Blend, 800 mg BC polyphenols + 800 mg SO polyphenols.

Supplementary figure 5 – GLU-FX: mean serum non-esterified fatty acids over time by treatment intent to treat population

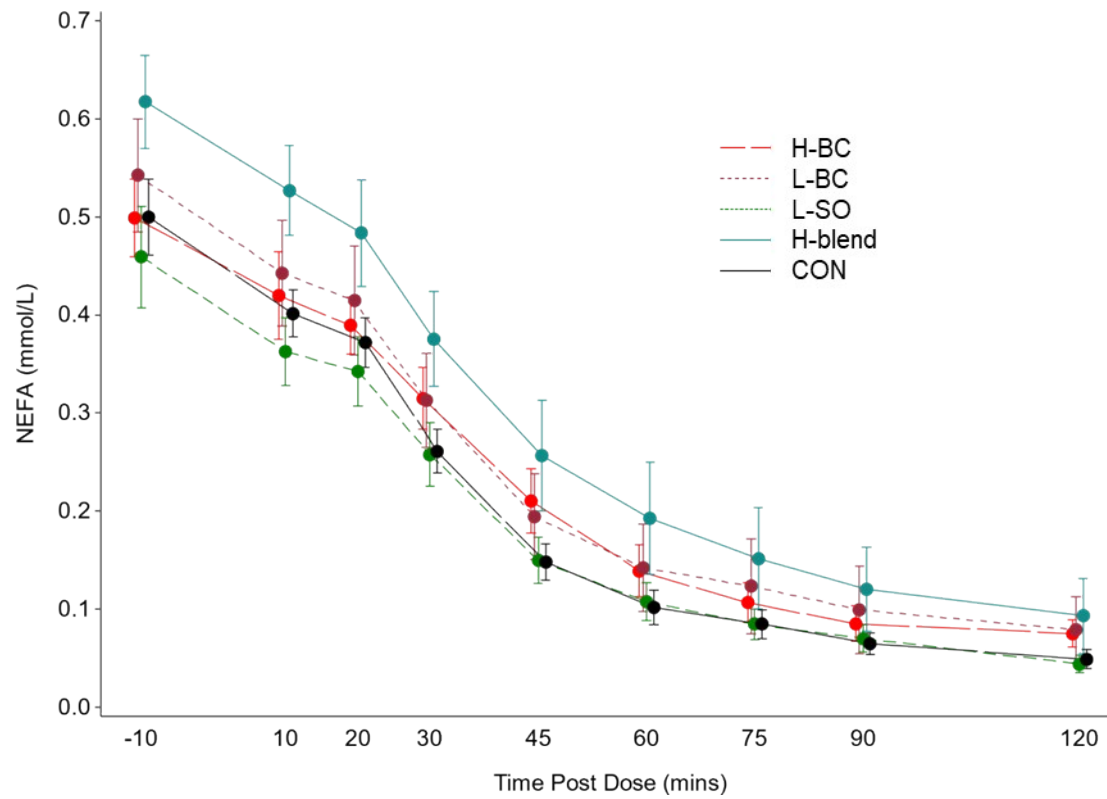

Error bars represent standard error. CON, 0 mg of blackcurrant (BC) or sweet orange (SO) polyphenols; H-BC, 1600 mg of BC polyphenols; L-BC, 800 mg of BC polyphenols; L-SO, 800 mg of SO polyphenols; H-Blend, 800 mg BC polyphenols + 800 mg SO polyphenols.

Supplementary figure 6 – GLU-FX: mean plasma PYY concentrations over time by treatment

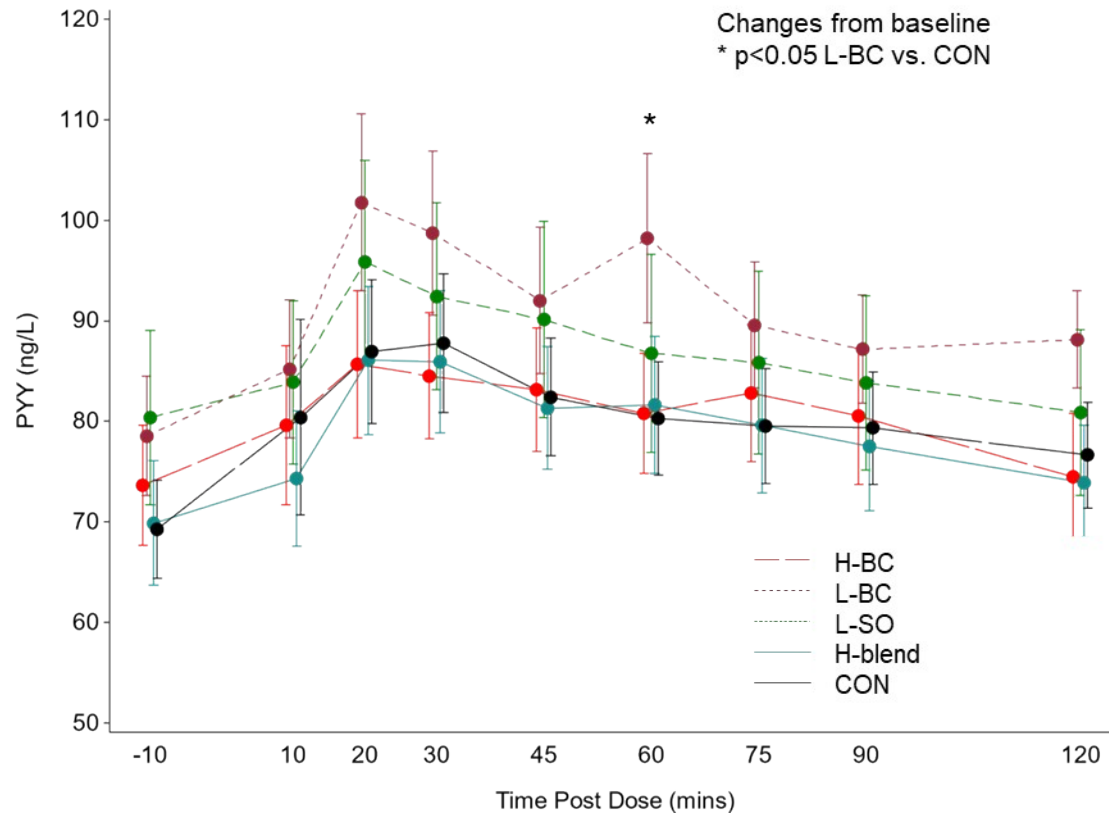

Error bars represent standard error. CON, 0 mg of blackcurrant (BC) or sweet orange (SO) polyphenols; H-BC, 1600 mg of BC polyphenols; L-BC, 800 mg of BC polyphenols; L-SO, 800 mg of SO polyphenols; H-Blend, 800 mg BC polyphenols + 800 mg SO polyphenols.

Supplementary figure 7 – GLU-FX: mean plasma GLP-1 concentrations over time by treatment

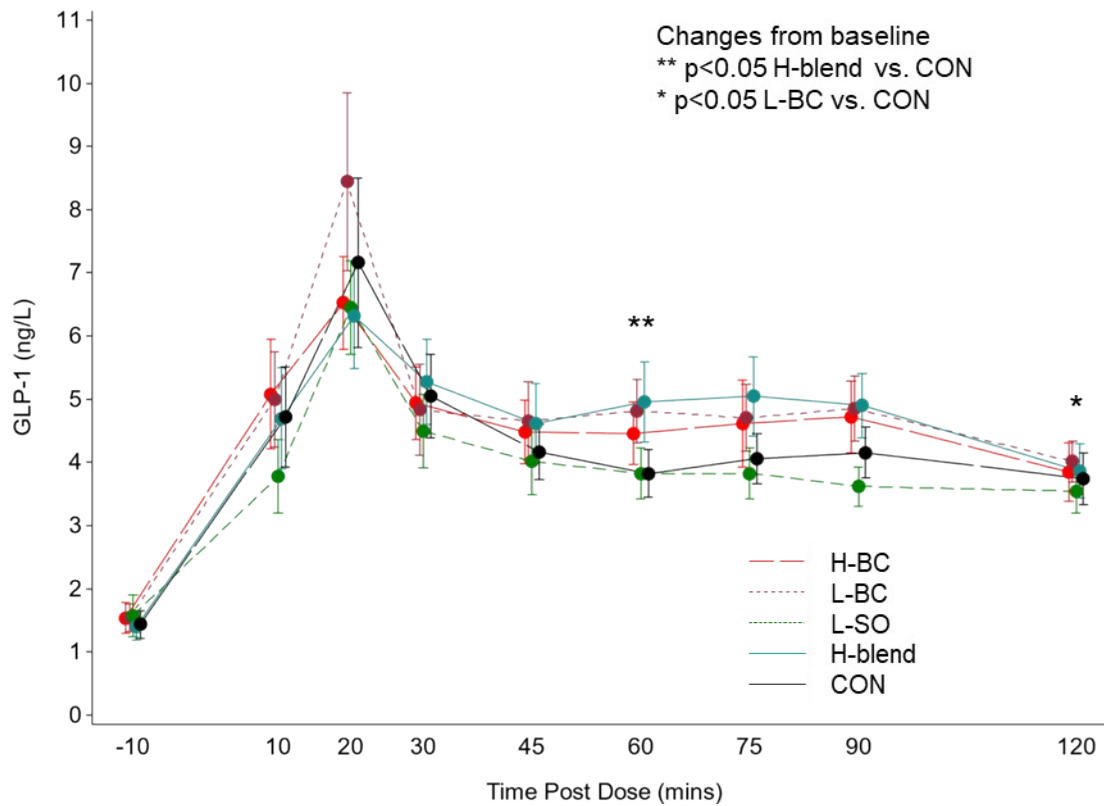

Error bars represent standard error. CON, 0 mg of blackcurrant (BC) or sweet orange (SO) polyphenols; H-BC, 1600 mg of BC polyphenols; L-BC, 800 mg of BC polyphenols; L-SO, 800 mg of SO polyphenols; H-Blend, 800 mg BC polyphenols + 800 mg SO polyphenols.

Supplementary figure 8 – GLU-FX Study: postprandial hunger, desire to eat and fullness scores by treatment.

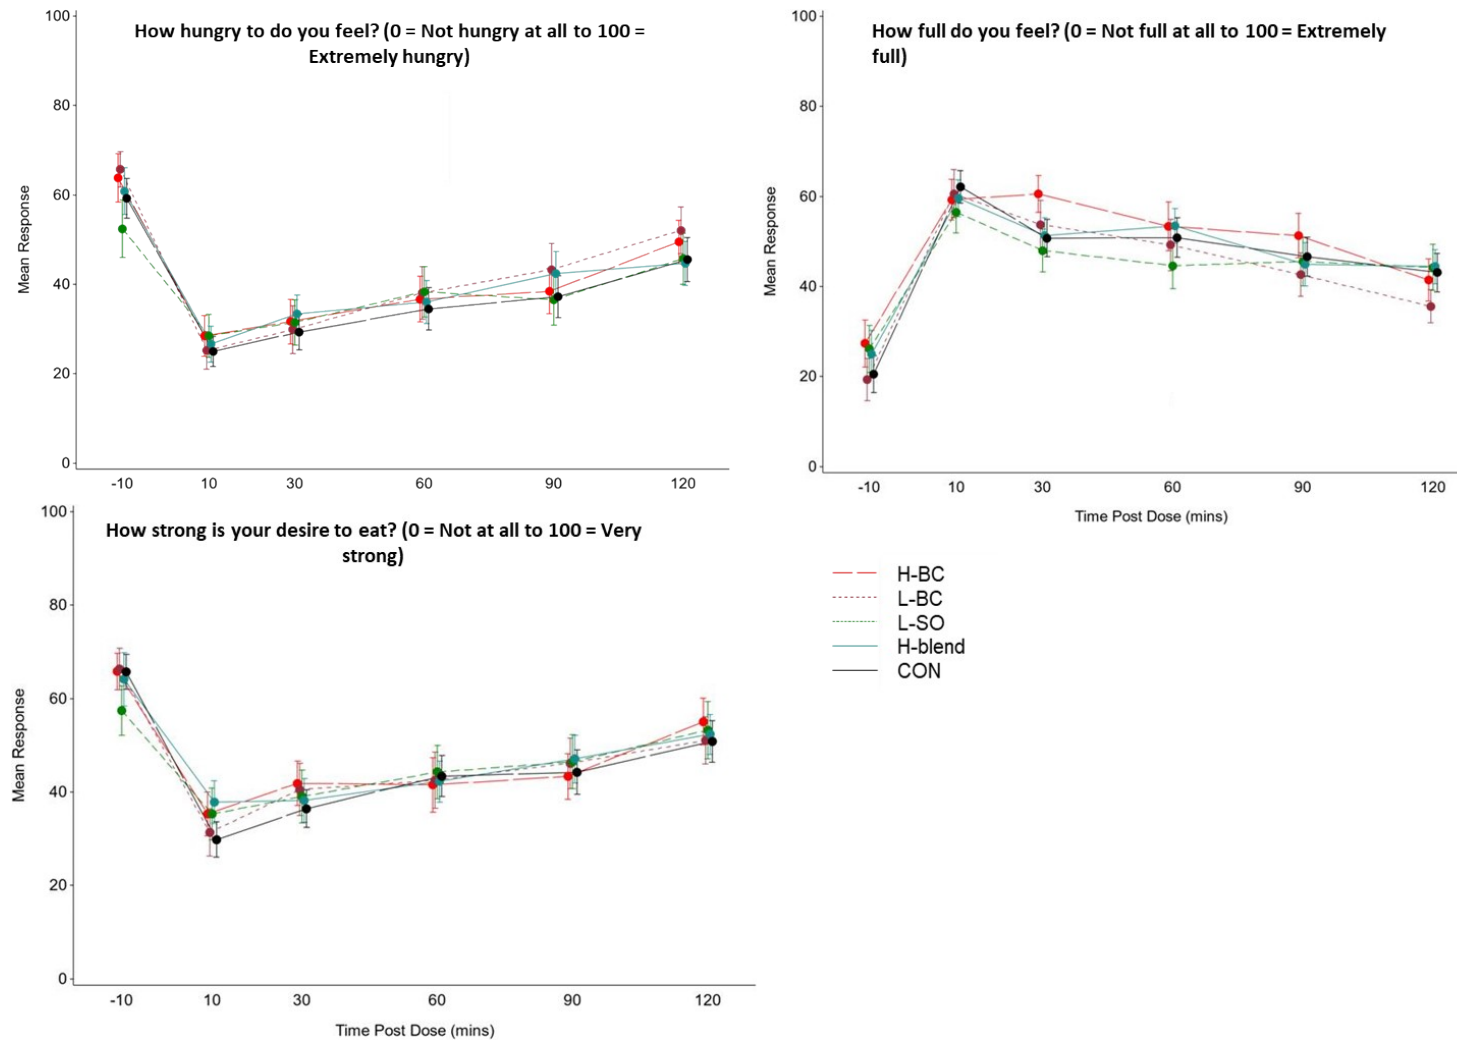

CON, 0 mg of blackcurrant (BC) or sweet orange (SO) polyphenols; H-BC, 1600 mg of BC polyphenols; L-BC, 800 mg of BC polyphenols; L-SO, 800 mg of SO polyphenols; H-Blend, 800 mg BC polyphenols + 800 mg SO polyphenols.



**Supplementary figure 9 - GLU-FX Study: Ratings of enjoyment, taste, bitterness and aftertaste of the test drinks.**

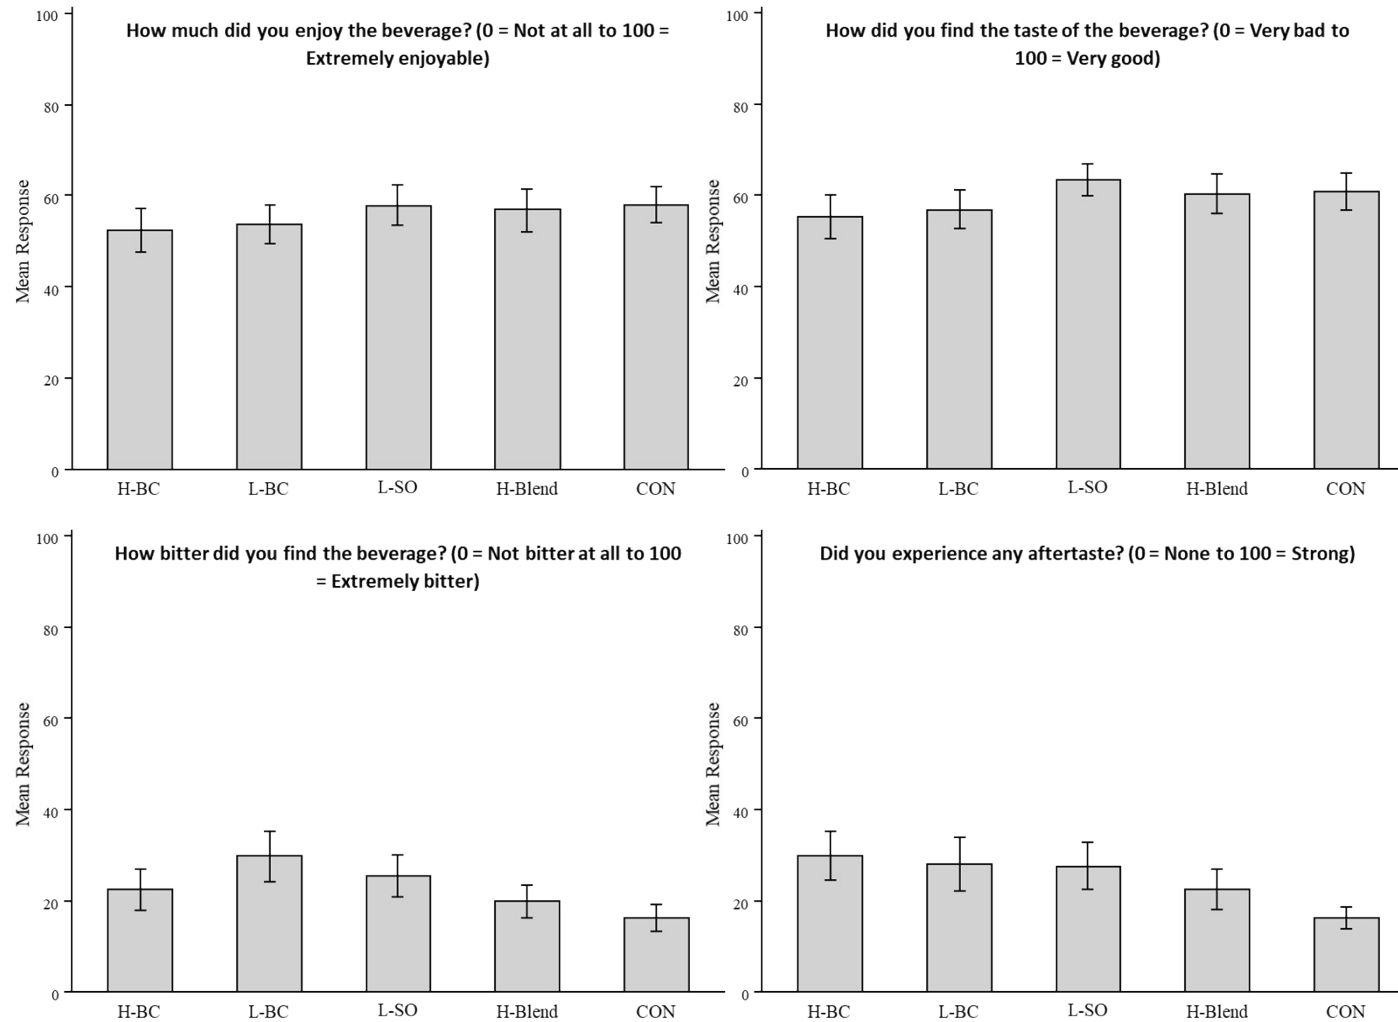

CON, 0 mg of blackcurrant (BC) or sweet orange (SO) polyphenols; H-BC, 1600 mg of BC polyphenols; L-BC, 800 mg of BC polyphenols; L-SO, 800 mg of SO polyphenols; H-Blend, 800 mg BC polyphenols + 800 mg SO polyphenols.

**Supplementary figure 10 - GLU-FX Study: Ratings of difficulty to consume and texture of the test drinks.**

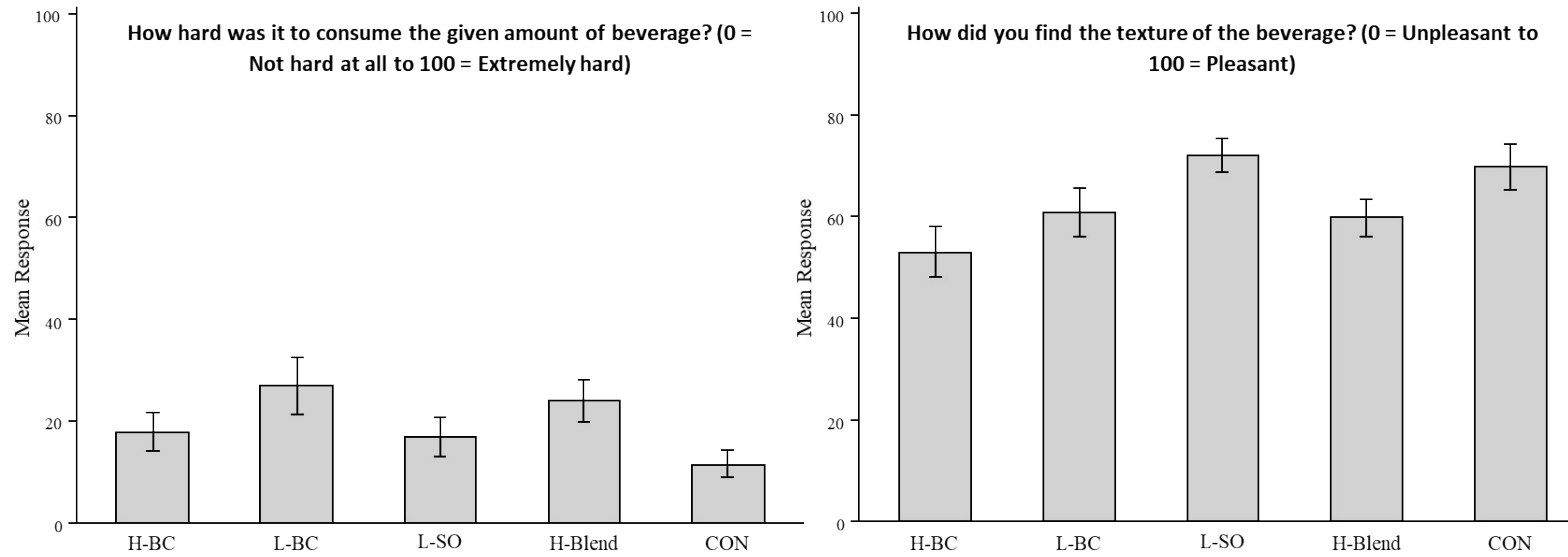

CON, 0 mg of blackcurrant (BC) or sweet orange (SO) polyphenols; H-BC, 1600 mg of BC polyphenols; L-BC, 800 mg of BC polyphenols; L-SO, 800 mg of SO polyphenols; H-Blend, 800 mg BC polyphenols + 800 mg SO polyphenols.

Supplementary figure 11 – GLU-MIX: mean serum insulin concentrations over time by treatment

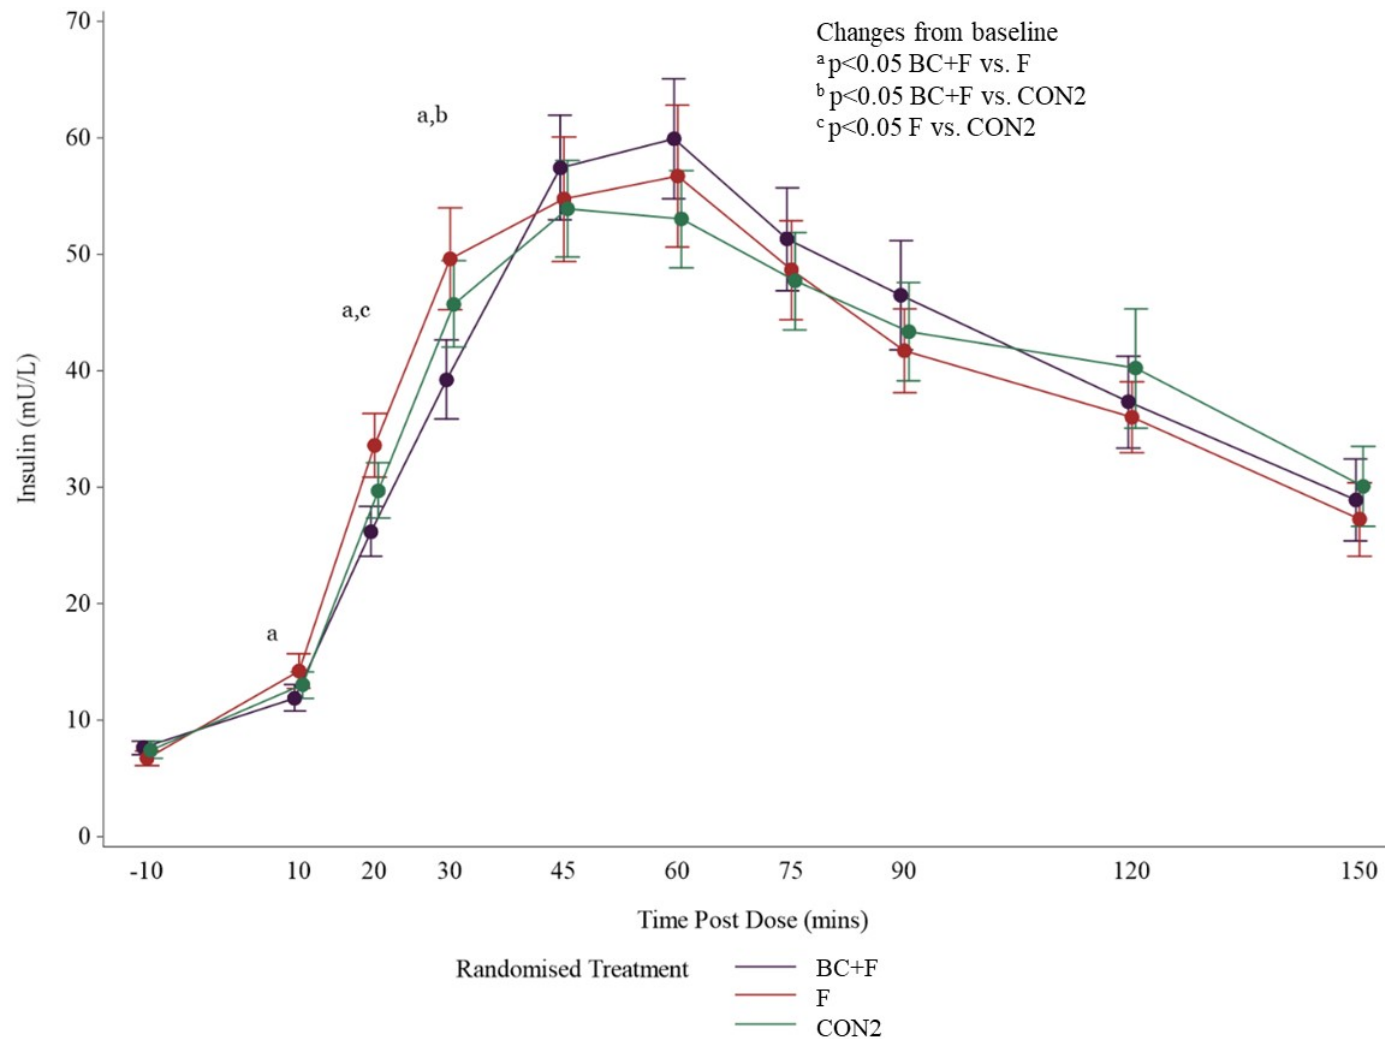

CON2, 0 mg BC polyphenols and 0 g fibre; F, 1.5 g total fibre; BC+F, 800 mg BC polyphenols + 1.5 g total fibre. Dietary fibre for BC+F and F treatments provided by orange pulp.



Supplementary figure 12 – GLU-MIX: mean serum C-peptide concentrations over time by treatment

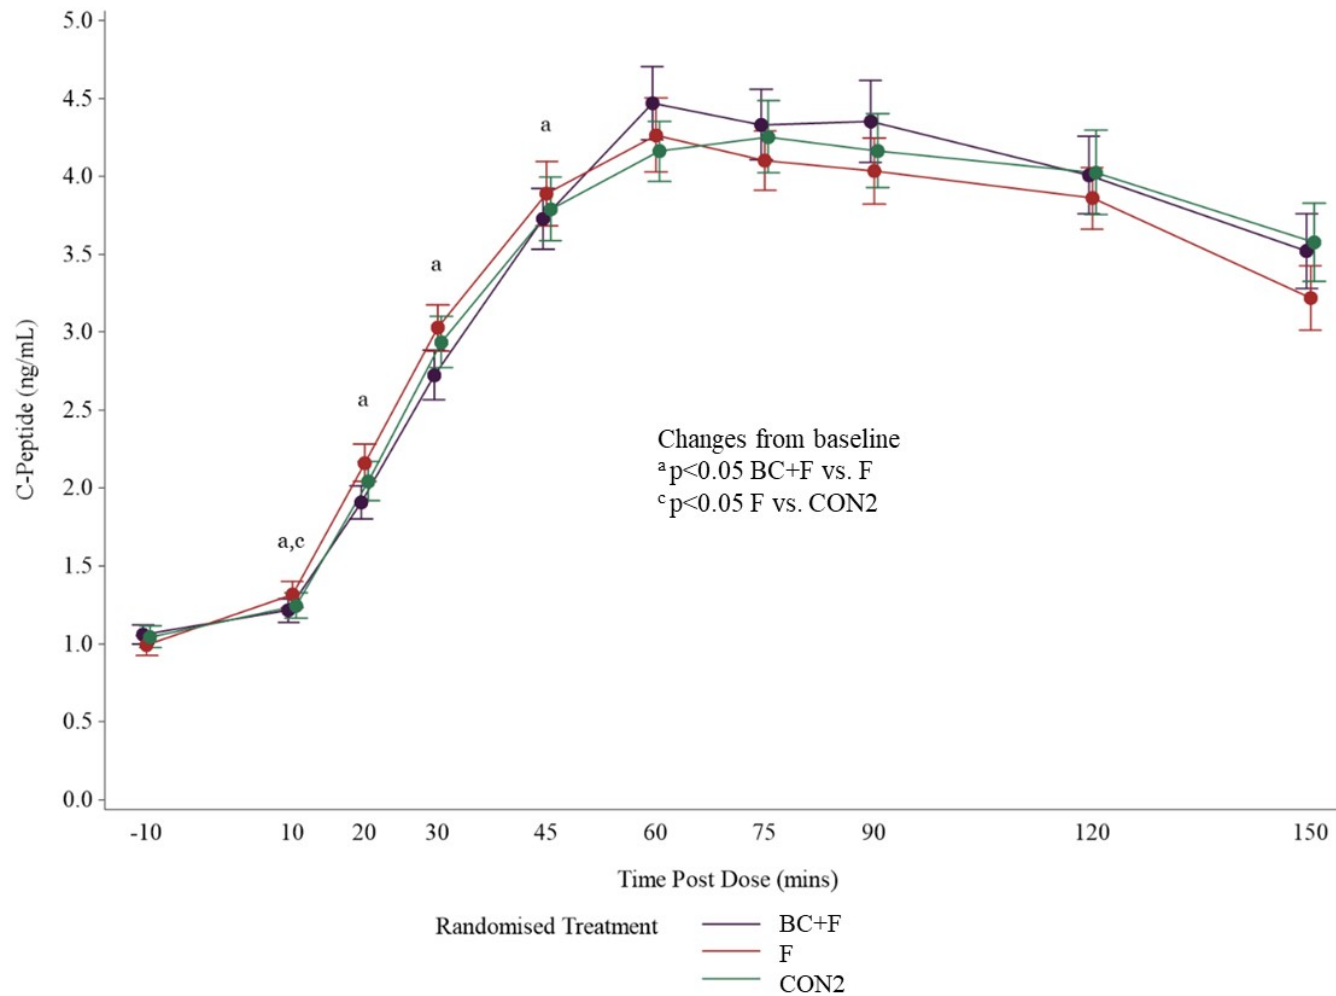

CON2, 0 mg BC polyphenols and 0 g fibre; F, 1.5 g total fibre; BC+F, 800 mg BC polyphenols + 1.5 g total fibre. Dietary fibre for BC+F and F treatments provided by orange pulp.

Supplementary figure 13 – GLU-MIX Study: postprandial hunger, desire to eat, and fullness scores by treatment.

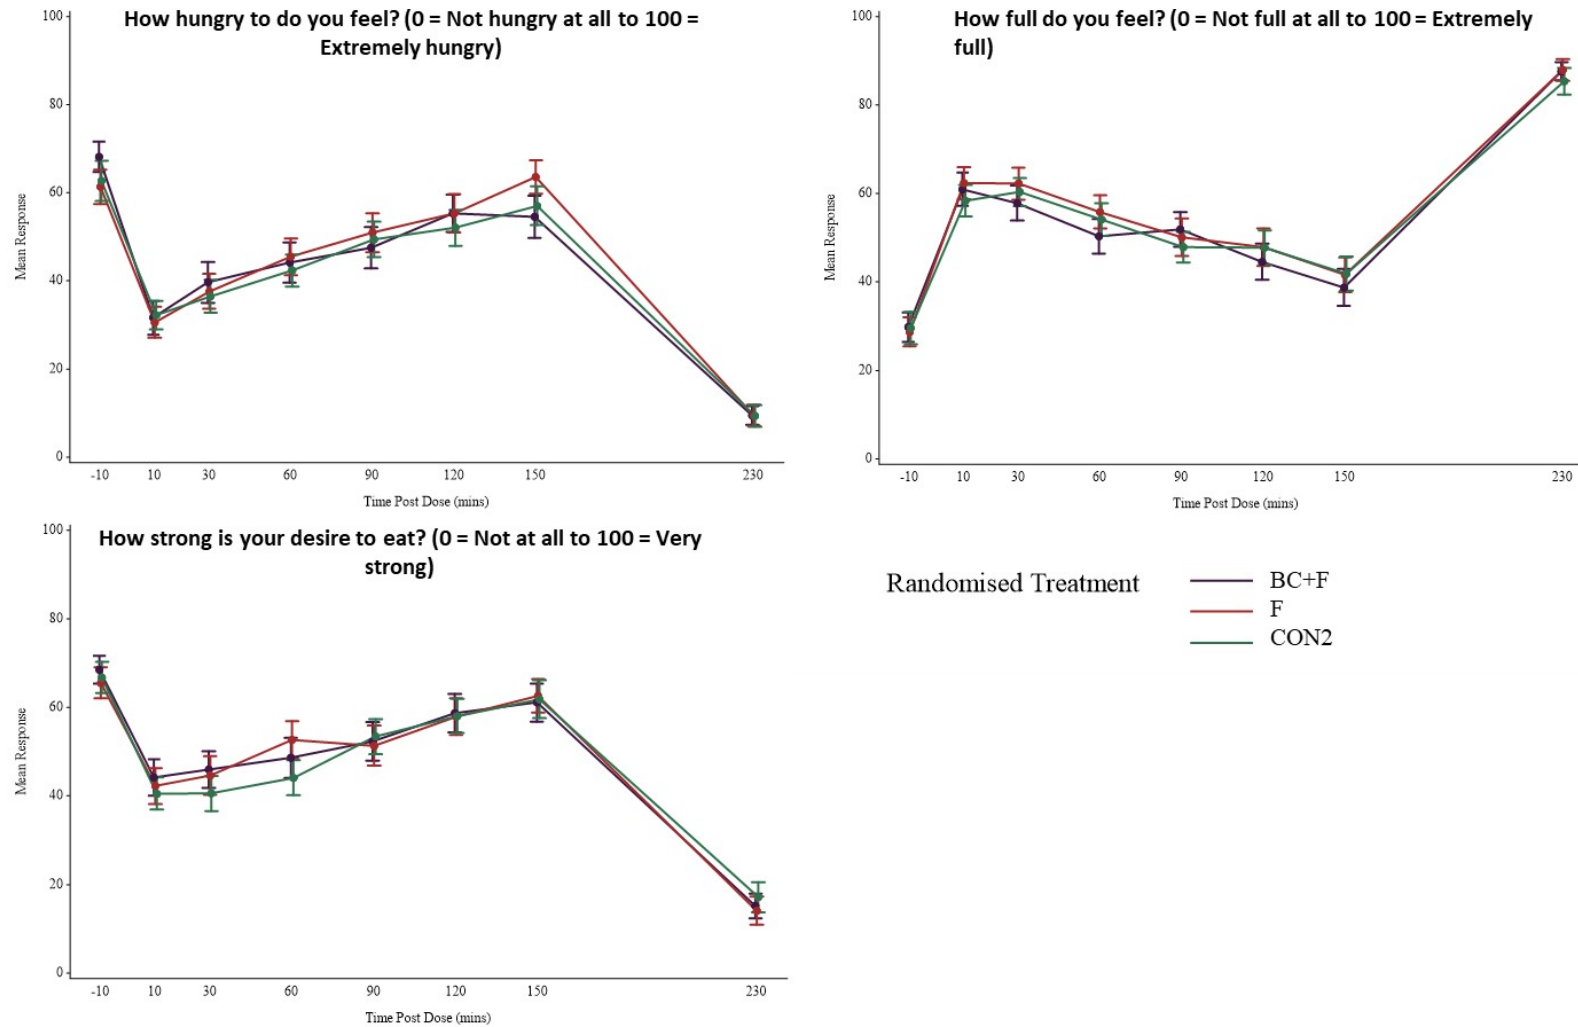

CON2, 0 mg BC polyphenols and 0 g fibre; F, 1.5 g total fibre; BC+F, 800 mg BC polyphenols + 1.5 g total fibre. Dietary fibre for BC+F and F treatments provided by orange pulp.

Supplementary figure 14 – GLU-MIX Study: postprandial thirstiness, happiness, feeling energised and alertness scores by treatment.

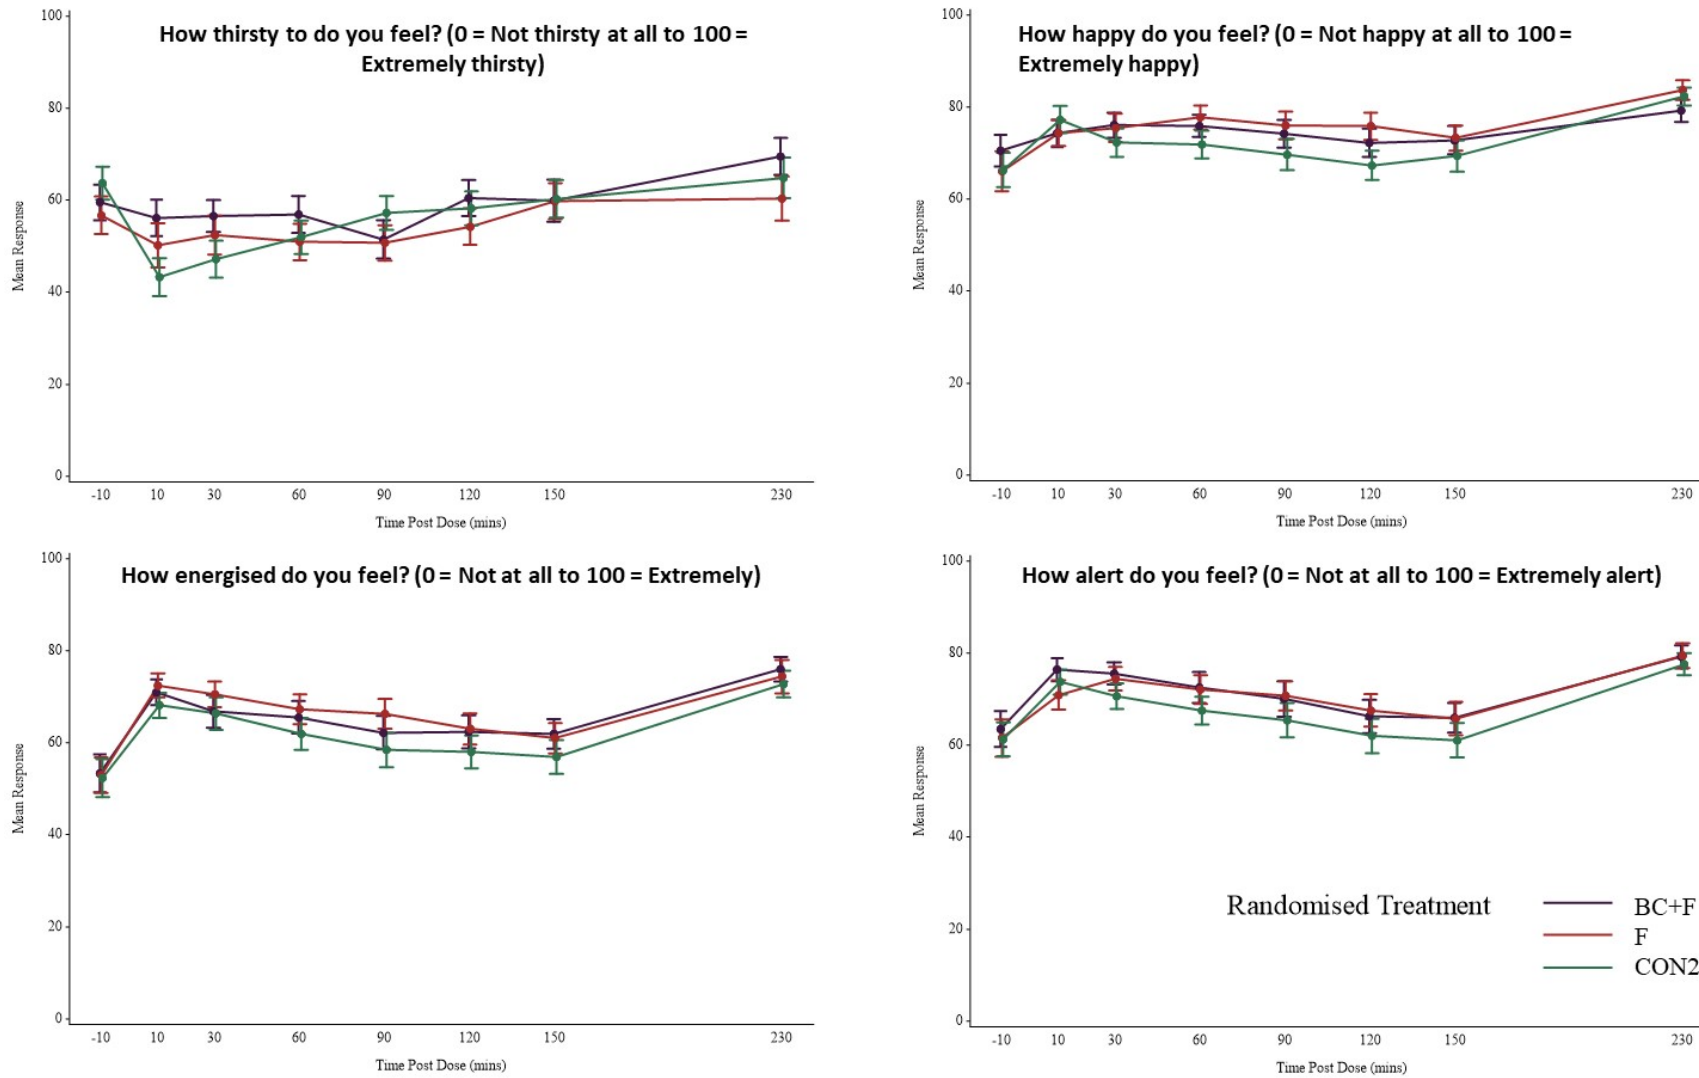

CON2, 0 mg BC polyphenols and 0 g fibre; F, 1.5 g total fibre; BC+F, 800 mg BC polyphenols + 1.5 g total fibre. Dietary fibre for BC+F and F treatments provided by orange pulp.

Supplementary figure 15 - GLU-MIX Study: Ratings of difficulty to consume, bitterness and texture of the test drinks.

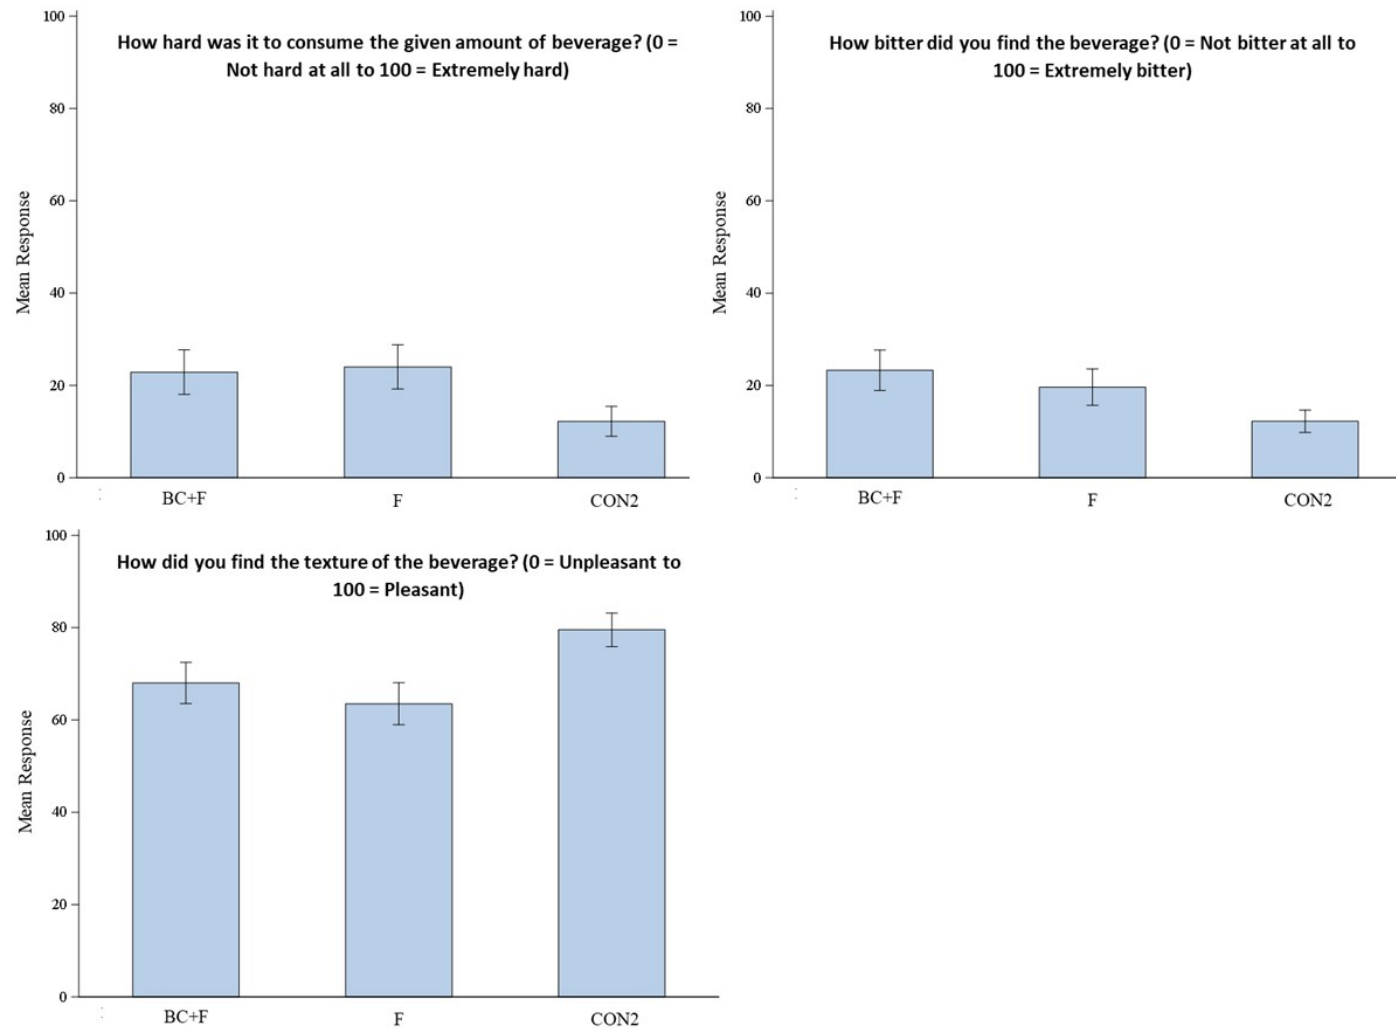

CON2, 0 mg BC polyphenols and 0 g fibre; F, 1.5 g total fibre; BC+F, 800 mg BC polyphenols + 1.5 g total fibre. Dietary fibre for BC+F and F treatments provided by orange pulp.



Supplementary figure 16 - GLU-MIX Study: Ratings of enjoyment, taste and aftertaste of the test drinks.

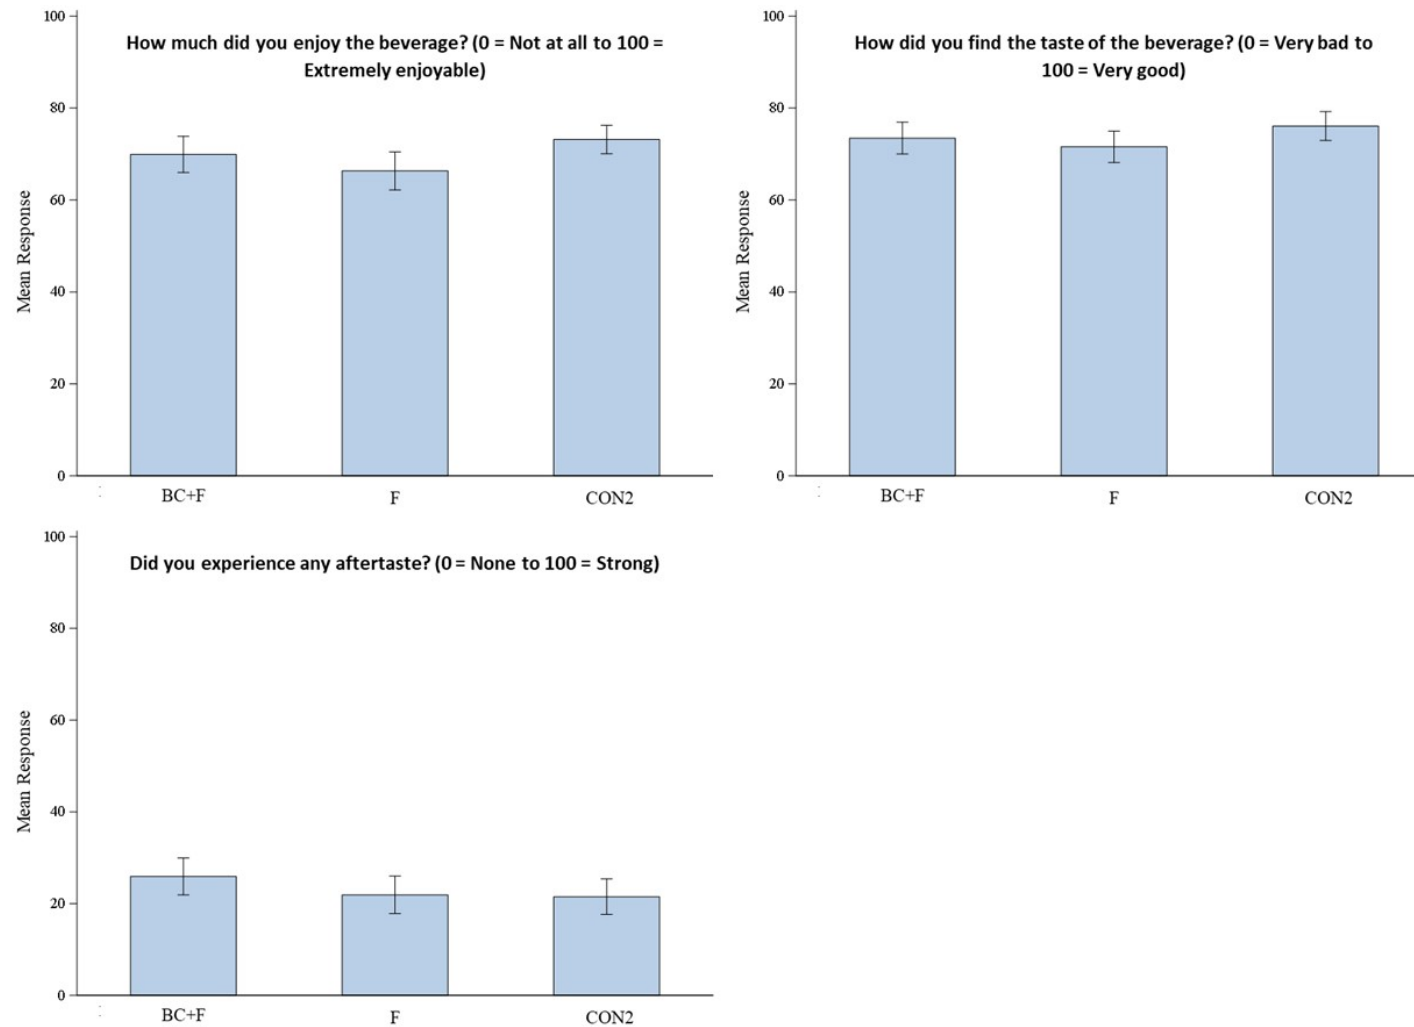

CON2, 0 mg BC polyphenols and 0 g fibre; F, 1.5 g total fibre; BC+F, 800 mg BC polyphenols + 1.5 g total fibre. Dietary fibre for BC+F and F treatments provided by orange pulp.
